# Supplementary material for: Whole Genome Sequencing of Newly Established Pancreatic Cancer Lines Identifies Novel Somatic Mutation (c.2587G>A) in Axon Guidance Receptor Plexin A1 as Enhancer of Proliferation and Invasion
Source: PLoS One. 2016 Mar 10;11(3):e0149833. doi: 10.1371/journal.pone.0149833 (PMC4786220; doi:10.1371/journal.pone.0149833)
Supplement: S5 Table — (XLSX) [file pone.0149833.s008.xlsx]

## Sheet: S5 Table
Table S5. Annotation legend for ANNOVAR whole genome sequencing tables
Annotated File Header	Explanation
Func	Function of the variant -- exonic, intronic, UTR, etc.
Gene	Gene name for variant
ExonicFunc	If the variant is exonic, synonymous, non-synonymous, indel, etc.
AAChange	If exonic, variant change in nucleotide and protein format
SegDup	Indicates if the variant is located in a segmental duplication region
ESP5400_ALL	MAF in Exome Sequencing Project dataset (5,400 exomes) for all populations
1000g2012feb_ALL	MAF in 1000Genomes February 2012 release
dbSNP135	RS# from the dbSNP database
AVSIFT	Pathogenicity score: closer to 0 is more damaging
LJB_PhyloP	Pathogenicity score from dbNSFP: conserved > 0.95, not conserved < 0.95
LJB_PhyloP_Pred	Pathogenicity call from dbNSFP: C - conserved, N - not conserved
LJB_SIFT	Pathogenicity score from dbNSFP: tolerated < 0.95, deleterious > 0.95
LJB_SIFT_Pred	Pathogenicity call from dbNSFP: T - tolerated, D - deleterious
LJB_PolyPhen2	Pathogenicity score from dbNSFP: probably damaging > 0.85, possibly damaging 0.85-0.15, benign < 0.15
LJB_PolyPhen2_Pred	Pathogenicity call: D - probably damaging, P - possibly damaging, B - benign
LJB_LRT	Pathogenicity probability score from dbNSFP: closer to 1 is more likely to be damaging -- see below
LJB_LRT_Pred	Pathogenicity score from dbNSFP: D - deleterious fulfills the following: (i) from a codon defined by LRT as significantly constrained (LRTorio0.001 and oo1), (ii) from a site with Z10 eutherian mammals alignments, and (iii) the alternative AA is not presented in any of the eutherian mammals N - otherwise neutral
LJB_MutationTaster	Pathogenicity probability score from dbNSFP: closer to 1 is more likely to be damaging -- see below
LJB_MutationTaster_Pred	Pathogenicity score from dbNSFP: automatically calculated categories: ‘‘disease_causing_automatic,’’ ‘‘disease_causing,’’ ‘‘polymorphism,’’ and ‘‘polymorphism_automatic,’’ which we coded as ‘‘A,’’ ‘‘D,’’ ‘‘N,’’ and ‘‘P,’’
LJB_GERP++	Nucleotide conservation score from dbNSFP GERP: Higher number is more conserved, > 0 is generally conserved
Chr	Chromosome of variant
Start	Start coordinate of variant
End	End coordinate of variant
Ref	Reference allele for variant
Obs	Observed allele for variant
Otherinfo	Other information
