# Supplementary material for: Whole Genome Sequencing of Newly Established Pancreatic Cancer Lines Identifies Novel Somatic Mutation (c.2587G>A) in Axon Guidance Receptor Plexin A1 as Enhancer of Proliferation and Invasion
Source: PLoS One. 2016 Mar 10;11(3):e0149833. doi: 10.1371/journal.pone.0149833 (PMC4786220; doi:10.1371/journal.pone.0149833)
Supplement: S7 Table — (XLSX) [file pone.0149833.s010.xlsx]

## Sheet: S7 Table
Table S7. Symbols and names of genes in axon guidance pathway
GENE SYMBOL	GENE NAME
ABL1	ABL proto-oncogene 1, non-receptor tyrosine kinase
ABLIM1	actin binding LIM protein 1
ABLIM2	actin binding LIM protein 2
ABLIM3	actin binding LIM protein 3
ARHGEF12	Rho guanine nucleotide exchange factor (GEF) 12
CDC42	cell division cycle 42
CDK5	cyclin-dependent kinase 5
CFL1	cofilin 1 (non-muscle)
CFL2	cofilin 2 (muscle)
CHP1	calcineurin-like EF-hand protein 1
CHP2	calcineurin-like EF-hand protein 2
CXCL12	chemokine (C-X-C motif) ligand 12
CXCR4	chemokine (C-X-C motif) receptor 4
DCC	DCC netrin 1 receptor
DPYSL2	dihydropyrimidinase-like 2
DPYSL5	dihydropyrimidinase-like 5
EFNA1	ephrin-A1
EFNA2	ephrin-A2
EFNA3	ephrin-A3
EFNA4	ephrin-A4
EFNA5	ephrin-A5
EFNB1	ephrin-B1
EFNB2	ephrin-B2
EFNB3	ephrin-B3
EPHA1	EPH receptor A1
EPHA2	EPH receptor A2
EPHA3	EPH receptor A3
EPHA4	EPH receptor A4
EPHA5	EPH receptor A5
EPHA6	EPH receptor A6
EPHA7	EPH receptor A7
EPHA8	EPH receptor A8
EPHB1	EPH receptor B1
EPHB2	EPH receptor B2
EPHB3	EPH receptor B3
EPHB4	EPH receptor B4
EPHB6	EPH receptor B6
FES	FES proto-oncogene, tyrosine kinase
FYN	FYN proto-oncogene, Src family tyrosine kinase
GNAI1	guanine nucleotide binding protein (G protein), alpha inhibiting activity polypeptide 1
GNAI2	guanine nucleotide binding protein (G protein), alpha inhibiting activity polypeptide 2
GNAI3	guanine nucleotide binding protein (G protein), alpha inhibiting activity polypeptide 3
GSK3B	glycogen synthase kinase 3 beta
HRAS	Harvey rat sarcoma viral oncogene homolog
ITGB1	integrin, beta 1 (fibronectin receptor, beta polypeptide, antigen CD29 includes MDF2, MSK12)
KRAS	Kirsten rat sarcoma viral oncogene homolog
L1CAM	L1 cell adhesion molecule
LIMK1	LIM domain kinase 1
LIMK2	LIM domain kinase 2
LRRC4C	leucine rich repeat containing 4C
MAPK1	mitogen-activated protein kinase 1
MAPK3	mitogen-activated protein kinase 3
MET	MET proto-oncogene, receptor tyrosine kinase
NCK1	NCK adaptor protein 1
NCK2	NCK adaptor protein 2
NFAT5	nuclear factor of activated T-cells 5, tonicity-responsive
NFATC1	nuclear factor of activated T-cells, cytoplasmic, calcineurin-dependent 1
NFATC2	nuclear factor of activated T-cells, cytoplasmic, calcineurin-dependent 2
NFATC3	nuclear factor of activated T-cells, cytoplasmic, calcineurin-dependent 3
NFATC4	nuclear factor of activated T-cells, cytoplasmic, calcineurin-dependent 4
NGEF	neuronal guanine nucleotide exchange factor
NRAS	neuroblastoma RAS viral (v-ras) oncogene homolog
NRP1	neuropilin 1
NTN1	netrin 1
NTN3	netrin 3
NTN4	netrin 4
NTNG1	netrin G1
PAK1	p21 protein (Cdc42/Rac)-activated kinase 1
PAK2	p21 protein (Cdc42/Rac)-activated kinase 2
PAK3	p21 protein (Cdc42/Rac)-activated kinase 3
PAK4	p21 protein (Cdc42/Rac)-activated kinase 4
PAK6	p21 protein (Cdc42/Rac)-activated kinase 6
PAK7	p21 protein (Cdc42/Rac)-activated kinase 7
PLXNA1	plexin A1
PLXNA2	plexin A2
PLXNA3	plexin A3
PLXNB1	plexin B1
PLXNB2	plexin B2
PLXNB3	plexin B3
PLXNC1	plexin C1
PPP3CA	protein phosphatase 3, catalytic subunit, alpha isozyme
PPP3CB	protein phosphatase 3, catalytic subunit, beta isozyme
PPP3CC	protein phosphatase 3, catalytic subunit, gamma isozyme
PPP3R1	protein phosphatase 3, regulatory subunit B, alpha
PPP3R2	protein phosphatase 3, regulatory subunit B, beta
PTK2	protein tyrosine kinase 2
RAC1	ras-related C3 botulinum toxin substrate 1
RAC2	ras-related C3 botulinum toxin substrate 2
RAC3	ras-related C3 botulinum toxin substrate 3
RASA1	RAS p21 protein activator (GTPase activating protein) 1
RGS3	regulator of G-protein signaling 3
RHOA	ras homolog family member A
RHOD	ras homolog family member D
RND1	Rho family GTPase 1
ROBO1	roundabout, axon guidance receptor, homolog 1 (Drosophila)
ROBO2	roundabout, axon guidance receptor, homolog 2 (Drosophila)
ROBO3	roundabout, axon guidance receptor, homolog 3 (Drosophila)
ROCK1	Rho-associated, coiled-coil containing protein kinase 1
ROCK2	Rho-associated, coiled-coil containing protein kinase 2
SEMA3A	sema domain, immunoglobulin domain (Ig), short basic domain, secreted, (semaphorin) 3A
SEMA3B	sema domain, immunoglobulin domain (Ig), short basic domain, secreted, (semaphorin) 3B
SEMA3C	sema domain, immunoglobulin domain (Ig), short basic domain, secreted, (semaphorin) 3C
SEMA3D	sema domain, immunoglobulin domain (Ig), short basic domain, secreted, (semaphorin) 3D
SEMA3E	sema domain, immunoglobulin domain (Ig), short basic domain, secreted, (semaphorin) 3E
SEMA3F	sema domain, immunoglobulin domain (Ig), short basic domain, secreted, (semaphorin) 3F
SEMA3G	sema domain, immunoglobulin domain (Ig), short basic domain, secreted, (semaphorin) 3G
SEMA4A	sema domain, immunoglobulin domain (Ig), short basic domain, secreted, (semaphorin) 4A
SEMA4B	sema domain, immunoglobulin domain (Ig), short basic domain, secreted, (semaphorin) 4B
SEMA4C	sema domain, immunoglobulin domain (Ig), short basic domain, secreted, (semaphorin) 4C
SEMA4D	sema domain, immunoglobulin domain (Ig), short basic domain, secreted, (semaphorin) 4D
SEMA4F	sema domain, immunoglobulin domain (Ig), short basic domain, secreted, (semaphorin) 4F
SEMA4G	sema domain, immunoglobulin domain (Ig), short basic domain, secreted, (semaphorin) 4G
SEMA5A	sema domain, immunoglobulin domain (Ig), short basic domain, secreted, (semaphorin) 5A
SEMA5B	sema domain, immunoglobulin domain (Ig), short basic domain, secreted, (semaphorin) 5B
SEMA6A	sema domain, immunoglobulin domain (Ig), short basic domain, secreted, (semaphorin) 6A
SEMA6B	sema domain, immunoglobulin domain (Ig), short basic domain, secreted, (semaphorin) 6B
SEMA6C	sema domain, immunoglobulin domain (Ig), short basic domain, secreted, (semaphorin) 6C
SEMA6D	sema domain, immunoglobulin domain (Ig), short basic domain, secreted, (semaphorin) 6D
SEMA7A	sema domain, immunoglobulin domain (Ig), short basic domain, secreted, (semaphorin) 7A
SLIT1	slit homolog 1 (Drosophila)
SLIT2	slit homolog 2 (Drosophila)
SLIT3	slit homolog 3 (Drosophila)
SRGAP1	SLIT-ROBO Rho GTPase activating protein 1
SRGAP2	SLIT-ROBO Rho GTPase activating protein 2
SRGAP3	SLIT-ROBO Rho GTPase activating protein 3
UNC5A	unc-5 homolog A (C. elegans)
UNC5B	unc-5 homolog B (C. elegans)
UNC5C	unc-5 homolog C (C. elegans)
UNC5D	unc-5 homolog D (C. elegans)
